# Supplementary material for: Random sorting of Campylobacter jejuni phase variants due to a narrow bottleneck during colonization of broiler chickens
Source: PubMed Central journal article supplement (PMC6097035; doi:10.1099/mic.0.000669), 2018-06-01
Supplement: mic-164-896-s001.pdf [file mic-164-896-s001.pdf]

0082 - 0206 - 0590 - 0646 - 0708

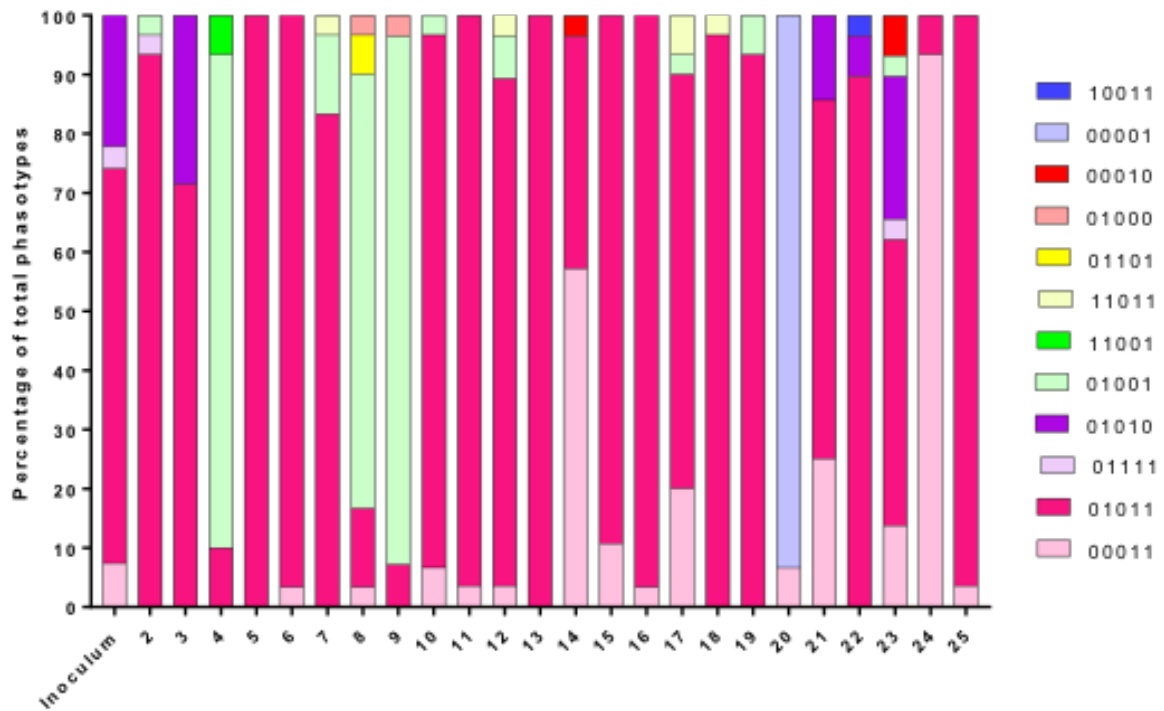

**Supplementary Figure 1. Phasotype frequencies for five phase-variable genes (group 2) in all chickens and the gavage.** Binary ON/OFF data taken from PSAnalyse are coded 1 for ON, and 0 for OFF. The legend shows the order of the five variable genes coded; *CJJ81176\_0082-CJJ81176\_0206-CJJ81176\_0590-CJJ81176\_0646-CJJ81176\_0708*. The size of the coloured bars indicates the % of the analysed population made up by that phasotype. Numbers on the x axis refer to specific chickens. The '*CJJ81176*' locus tag is omitted from the figure.

0758 - 0765 - 1321 - 1325 - 1327

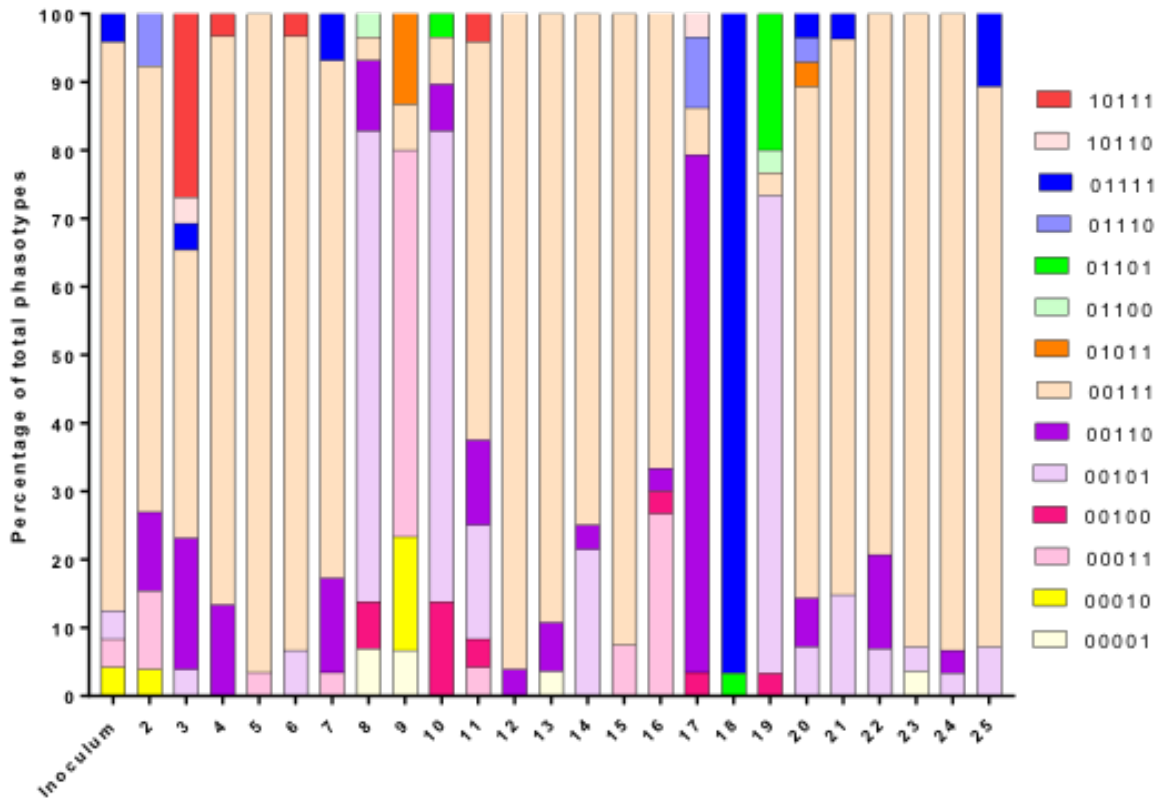

**Supplementary Figure 2. Phasotype frequencies for five phase-variable genes (group 3) in all chickens and the gavage.** Binary ON/OFF data taken from PSAnalyse are coded 1 for ON, and 0 for OFF. The legend shows the order of the five variable genes coded; *CJJ81176\_0758-CJJ81176\_0765-CJJ81176\_1321-CJJ81176\_1325-CJJ81176\_1327*. The size of the coloured bars indicates the % of the analysed population made up by that phasotype. Numbers on the x axis refer to specific chickens. The '*CJJ81176*' locus tag is omitted from the figure.

1341 - 1429 - 1432 - 1435

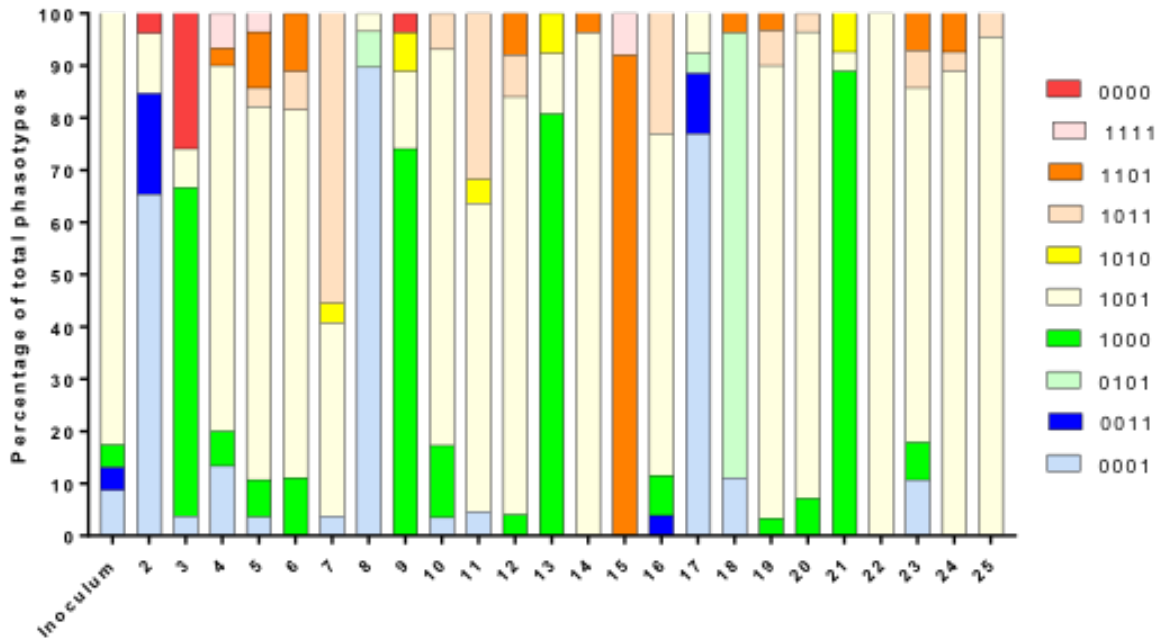

**Supplementary Figure 3. Phasotype frequencies for four phase-variable genes (group 4) in all chickens and the gavage.** Binary ON/OFF data taken from PSAnalyse are coded 1 for ON, and 0 for OFF. The legend shows the order of the four variable genes coded; *CJJ81176\_1341-CJJ81176\_1429-CJJ81176\_1432-CJJ81176\_1435*. The size of the coloured bars indicates the % of the analysed population made up by that phasotype. Numbers on the x axis refer to specific chickens. The '*CJJ81176*' locus tag is omitted from the figure.

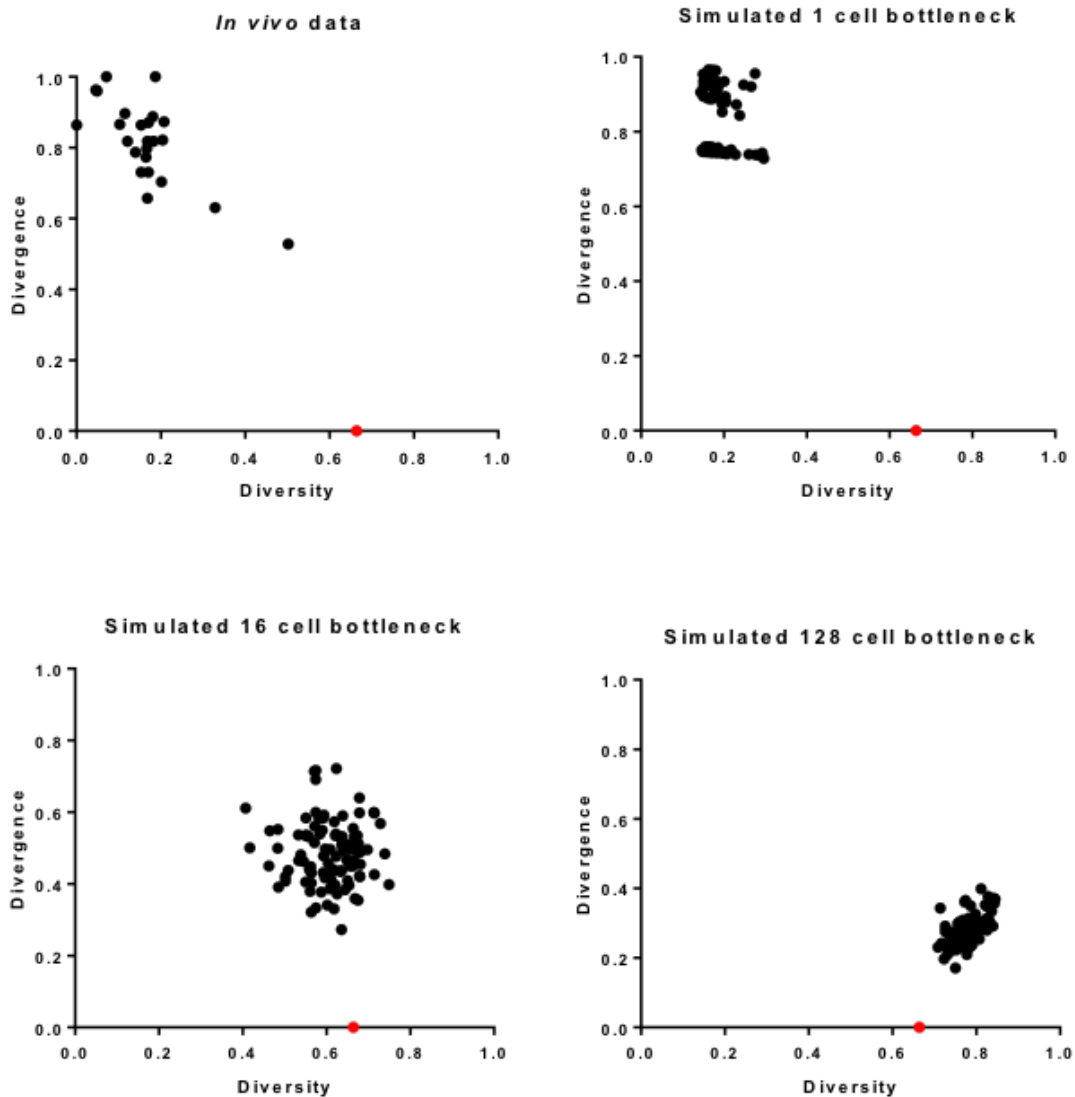

### Supplementary Figure 4

Diversity scores were calculated using the numbers of colonies with each phasotype for the phasotype composed of the five most variable genes (see Figure 5). *In silico* simulations were performed using a previously published model to determine the effects of bottleneck size on phasotype prevalence in *C. jejuni* populations [11]. The input for the model was the phasotype distribution obtained from the inoculum of the *in vivo* dataset (*in vivo* data panel). The model was run for THREE consecutive bottlenecks with sizes of 1, 16, and 128 cells. The diversity of the input (inoculum) population is shown by a red point on each graph. Numbers on the x axis refer to specific chickens.

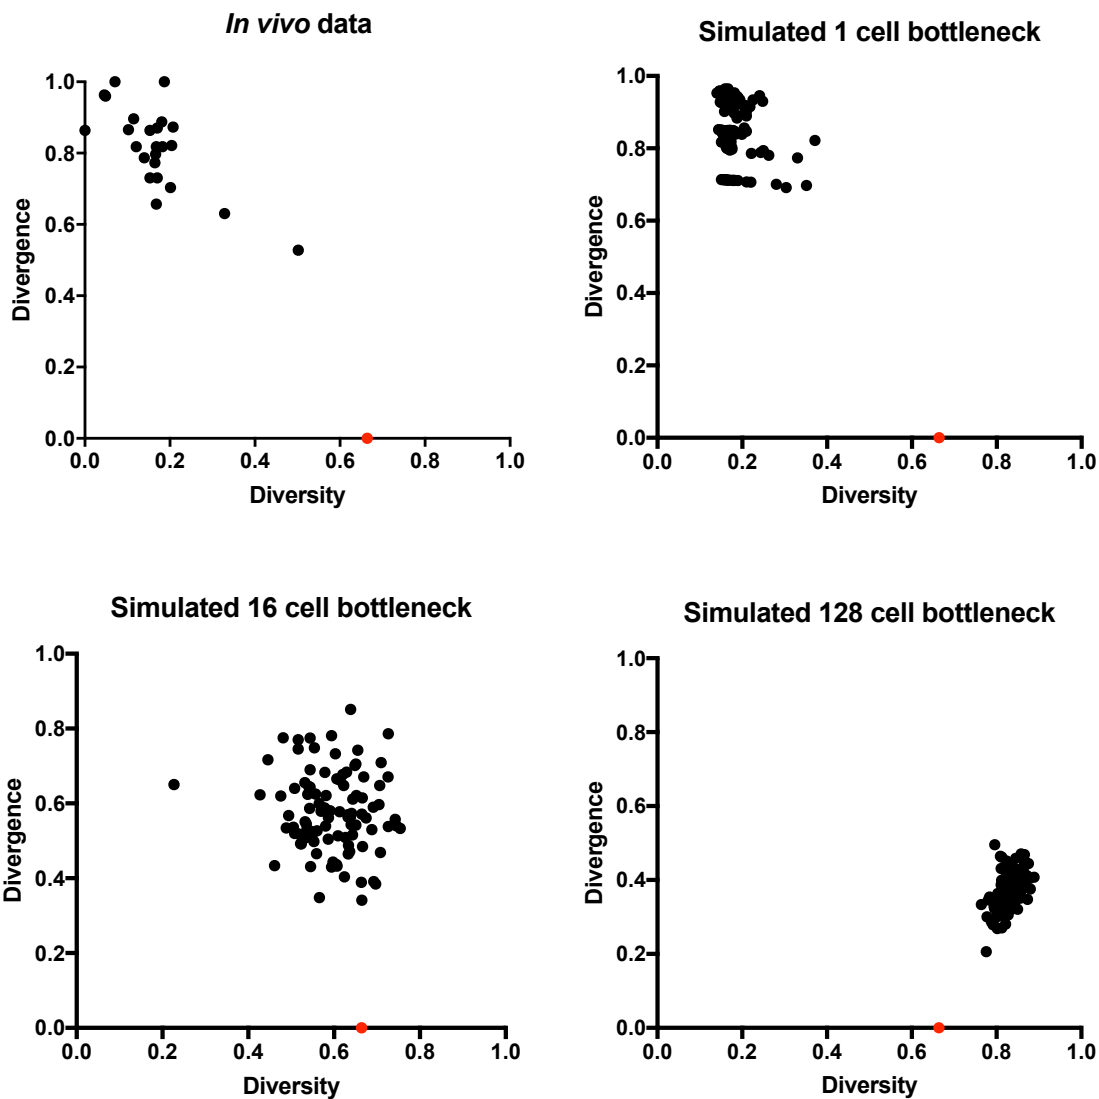

### Supplementary Figure 5

Diversity scores were calculated using the numbers of colonies with each phasotype for the phasotype composed of the five most variable genes (see Figure 5). *In silico* simulations were performed using a previously published model to determine the effects of bottleneck size on phasotype prevalence in *C. jejuni* populations [11]. The input for the model was the phasotype distribution obtained from the inoculum of the *in vivo* dataset (*in vivo* data panel). The model was run for FIVE consecutive bottlenecks with sizes of 1, 16, and 128 cells. The diversity of the input (inoculum) population is shown by a red point on each graph. Numbers on the x axis refer to specific chickens.
